# Supplementary material for: Tunable Photodetectors via in Situ Thermal Conversion of TiS<sub>3</sub> to TiO<sub>2</sub>
Source: Preprints.org preprint supplement (doi:10.20944/preprints202003.0008.v1), 2020-03-01
Supplement: Supplementary file 1 [file supplementary]

# Supporting Information: Tunable photodetectors via *in situ* thermal conversion of $\text{TiS}_3$ to $\text{TiO}_2$

Foad Ghasemi<sup>1,2,+</sup>, Riccardo Frisenda<sup>\*3,+</sup>, Eduardo Flores<sup>4</sup>, Nikos Papadopoulos<sup>5</sup>, Robert Biele<sup>6,7</sup>, David Perez de Lara<sup>1</sup>, Herre van der Zant<sup>5</sup>, Kenji Watanabe<sup>8</sup>, Takashi Taniguchi<sup>8</sup>, Roberto D'Agosta<sup>6,9</sup>, Jose R. Ares<sup>4</sup>, Carlos Sánchez<sup>4,10</sup>, Isabel J. Ferrer<sup>4,10</sup> and Andres Castellanos-Gomez<sup>\*3</sup>

<sup>1</sup> Instituto Madrileño de Estudios Avanzados en Nanociencia (IMDEA-Nanociencia), Campus de Cantoblanco, E-28049 Madrid, Spain.

<sup>2</sup> Nanoscale Physics Device Lab (NPDL), Department of Physics, University of Kurdistan, 66177-15175 Sanandaj, Iran.

<sup>3</sup> Materials Science Factory, Instituto de Ciencia de Materiales de Madrid (ICMM-CSIC), E-28049, Madrid, Spain.

<sup>4</sup> Materials of Interest in Renewable Energies Group (MIRE Group), Dpto. de Física de Materiales, Universidad Autónoma de Madrid, UAM, Campus de Cantoblanco, E-28049 Madrid, Spain.

<sup>5</sup> Kavli Institute of Nanoscience, Delft University of Technology, Lorentzweg 1, Delft 2628 CJ, The Netherlands.

<sup>6</sup> Nano-Bio Spectroscopy Group and European Theoretical Spectroscopy Facility (ETSF), Universidad del País Vasco CFM CSIC-UPV/EHU-MPC & DIPC, Av.Tolosa 72 ,20018, San Sebastián, Spain.

<sup>7</sup> Institute for Materials Science and Max Bergmann Center of Biomaterials, TU Dresden, 01062 Dresden, Germany.

<sup>8</sup> National Institute for Materials Science, Namiki 1-1, Tsukuba, Ibaraki 305-0044, Japan.

<sup>9</sup> IKERBASQUE, Basque Foundation for Science, 48013 Bilbao, Spain.

<sup>10</sup> Instituto Nicolás Cabrera, Universidad Autónoma de Madrid, UAM, Campus de Cantoblanco, E-28049 Madrid, Spain.

\*E-mail: [riccardo.frisenda@csic.es](mailto:riccardo.frisenda@csic.es), [andres.castellanos@csic.es](mailto:andres.castellanos@csic.es).

+ These two authors contributed equally to this work.

## Section S1 – Additional optical characterization of the oxidation of $\text{TiS}_3$ nanoribbons

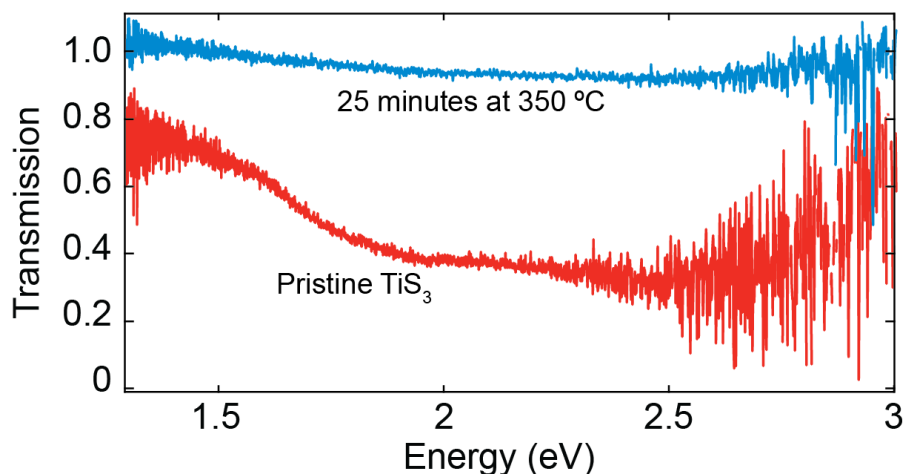

**Figure S1:** Energy resolved transmission of  $\text{TiS}_3$  and  $\text{TiO}_2$ .

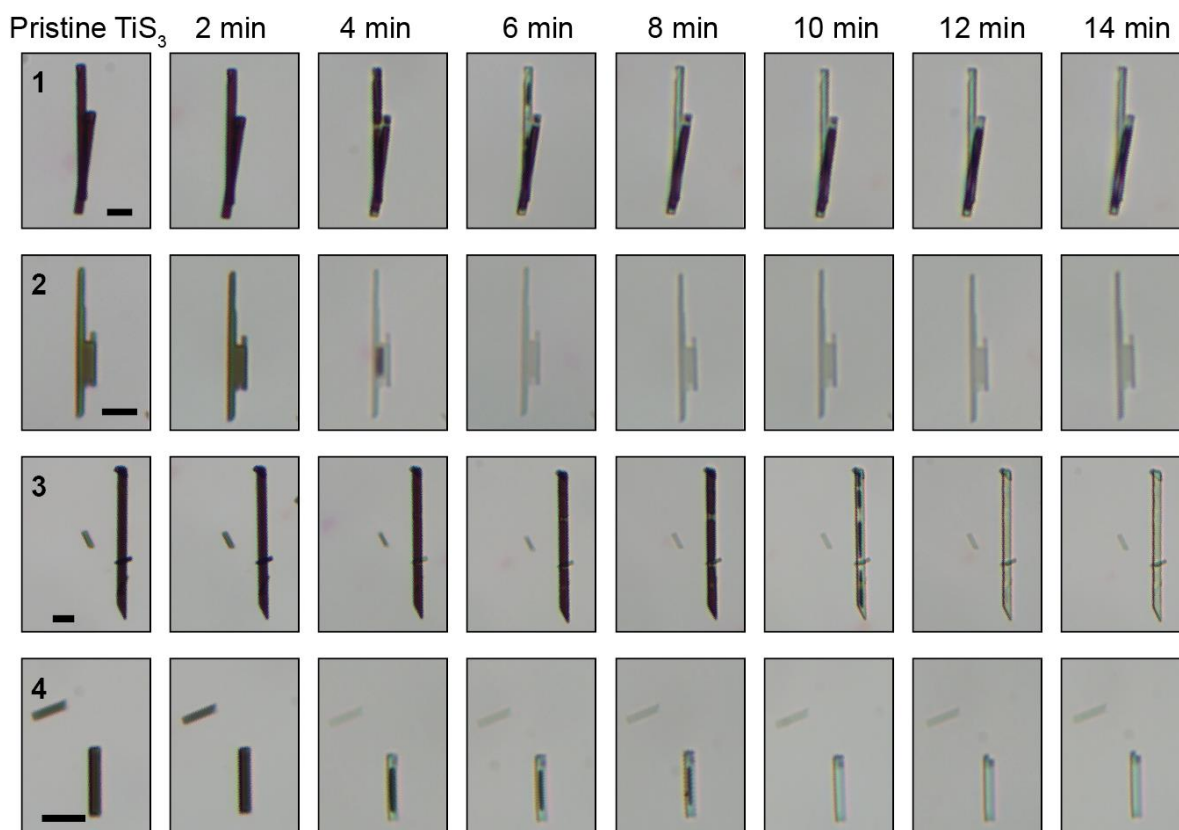

**Figure S2:** Optical image of individual  $\text{TiS}_3$  nanoribbons transferred onto an ITO/glass substrate. The different rows show various nanoribbons identified in the same substrate. The leftmost picture of each row has been recorded on the pristine  $\text{TiS}_3$ , before heating the substrate. The subsequent images have been recorded after heating the sample to 320 °C for the time indicated in each column. The black scale bars in the leftmost pictures correspond to 10  $\mu\text{m}$ .

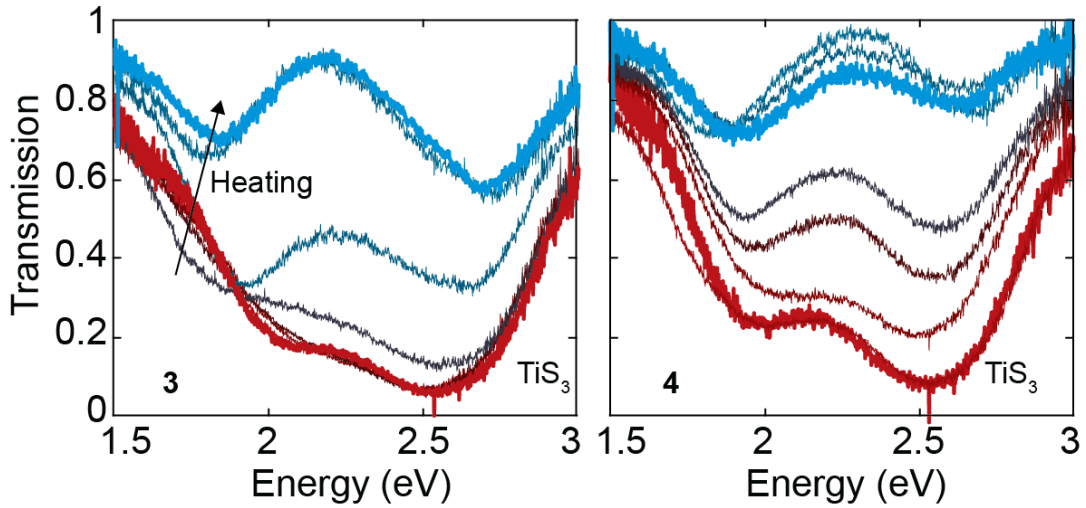

**Figure S3:** Energy resolved transmission of ribbons **3** and **4** from Fig. S2. The curves drawn with thick lines correspond to the initial (red) and final (blue) state of the ribbon under study.

### Section S2 – TiS<sub>3</sub> photodetector annealed in vacuum

As a control experiment, to investigate the influence of the temperature in absence of oxygen, we studied a TiS<sub>3</sub> photodetector that we heated above 320 °C in vacuum. Figure S4a shows the responsivity of the device in its pristine state (red curve) and after 10, 20 and 30 minutes at 320 °C in vacuum. The shape of the responsivity (and the power exponent in panel b) is preserved and the device shows an almost flat response from less than 400 nm to more than 700 nm (as can be also seen in panel c), typical of TiS<sub>3</sub> photodetectors.

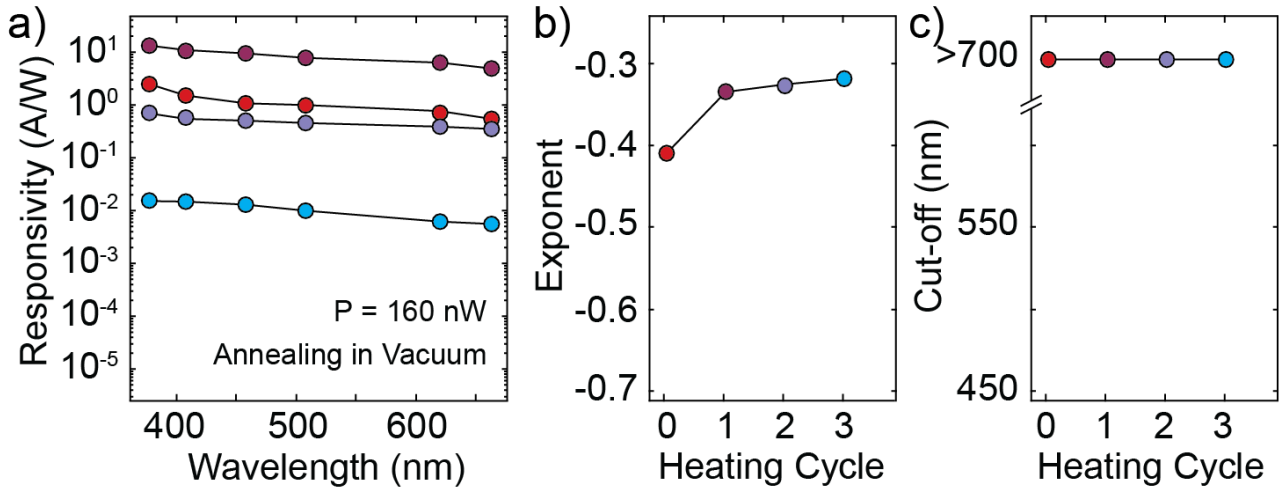

**Figure S4:** a) Responsivity of the device as a function of wavelength. The pristine TiS<sub>3</sub> device (top) was heated at 320 °C in vacuum in steps of 10 minutes and after each step the responsivity was measured. b) Responsivity exponent as a function of heating cycle. c) Cut-off wavelength as a function of heating cycle.

### Section S3 –TiS<sub>3</sub> photodetectors annealed in air

In our study we characterized a total of 12 TiS<sub>3</sub> photodetecting devices, 11 devices have been heated above 320 °C in air (devices 1-11) and 1 device has been heated above 320 °C in vacuum as a control experiment. When heating up the device in air we managed to successfully convert the TiS<sub>3</sub> photodetector in a TiO<sub>2</sub> photodetector without losing the functionality in 4 devices, corresponding to a success rate of 36%. Figure S5a shows the responsivity as a function of wavelength of devices 1-11 each in its pristine state and Figure S5b shows the responsivity of devices 1-4, which have been successfully converted to TiO<sub>2</sub> photodetectors, in their initial and final states.

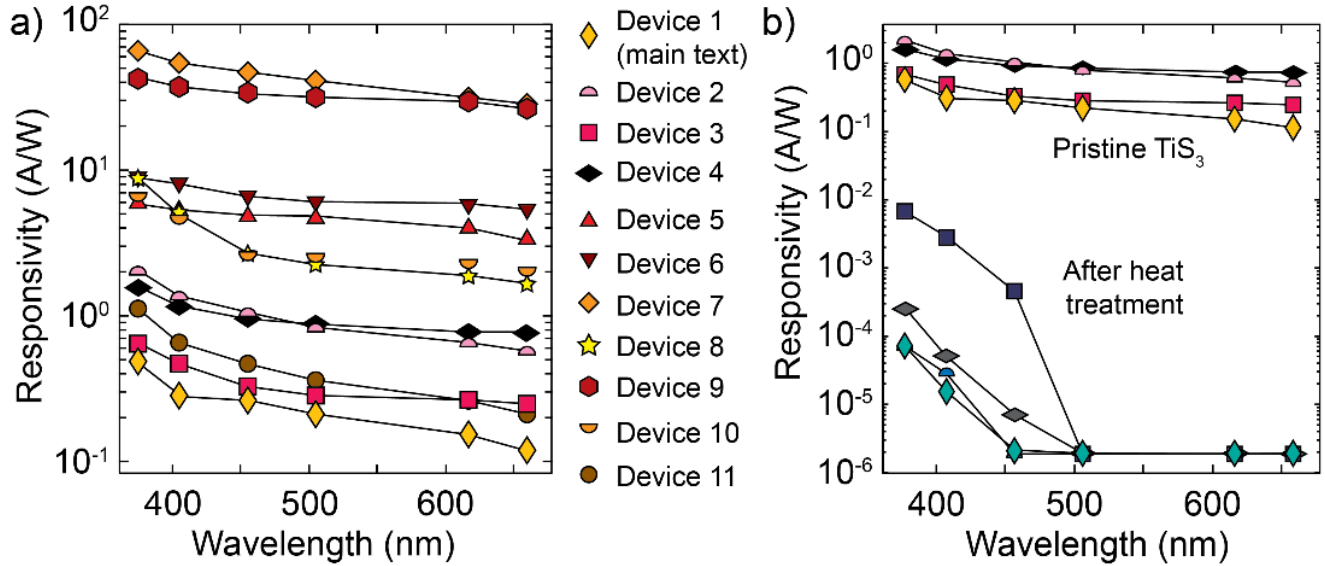

**Figure S5:** a) Responsivity as a function of wavelength of the pristine TiS<sub>3</sub> devices investigated in this work. b) Responsivity of the TiS<sub>3</sub> devices which have been successfully converted in TiO<sub>2</sub> photodetectors by heating at 320 °C. The four bottom curves correspond to the oxidized TiO<sub>2</sub> devices.

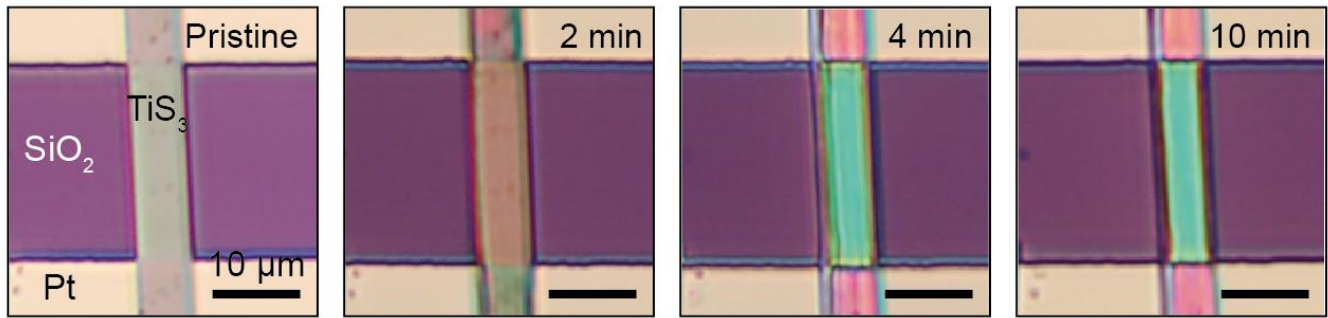

**Figure S6:** Optical microscope image of a TiS<sub>3</sub> photodetector (device 1) just after fabrication (left panel) and at different steps of the heating process.

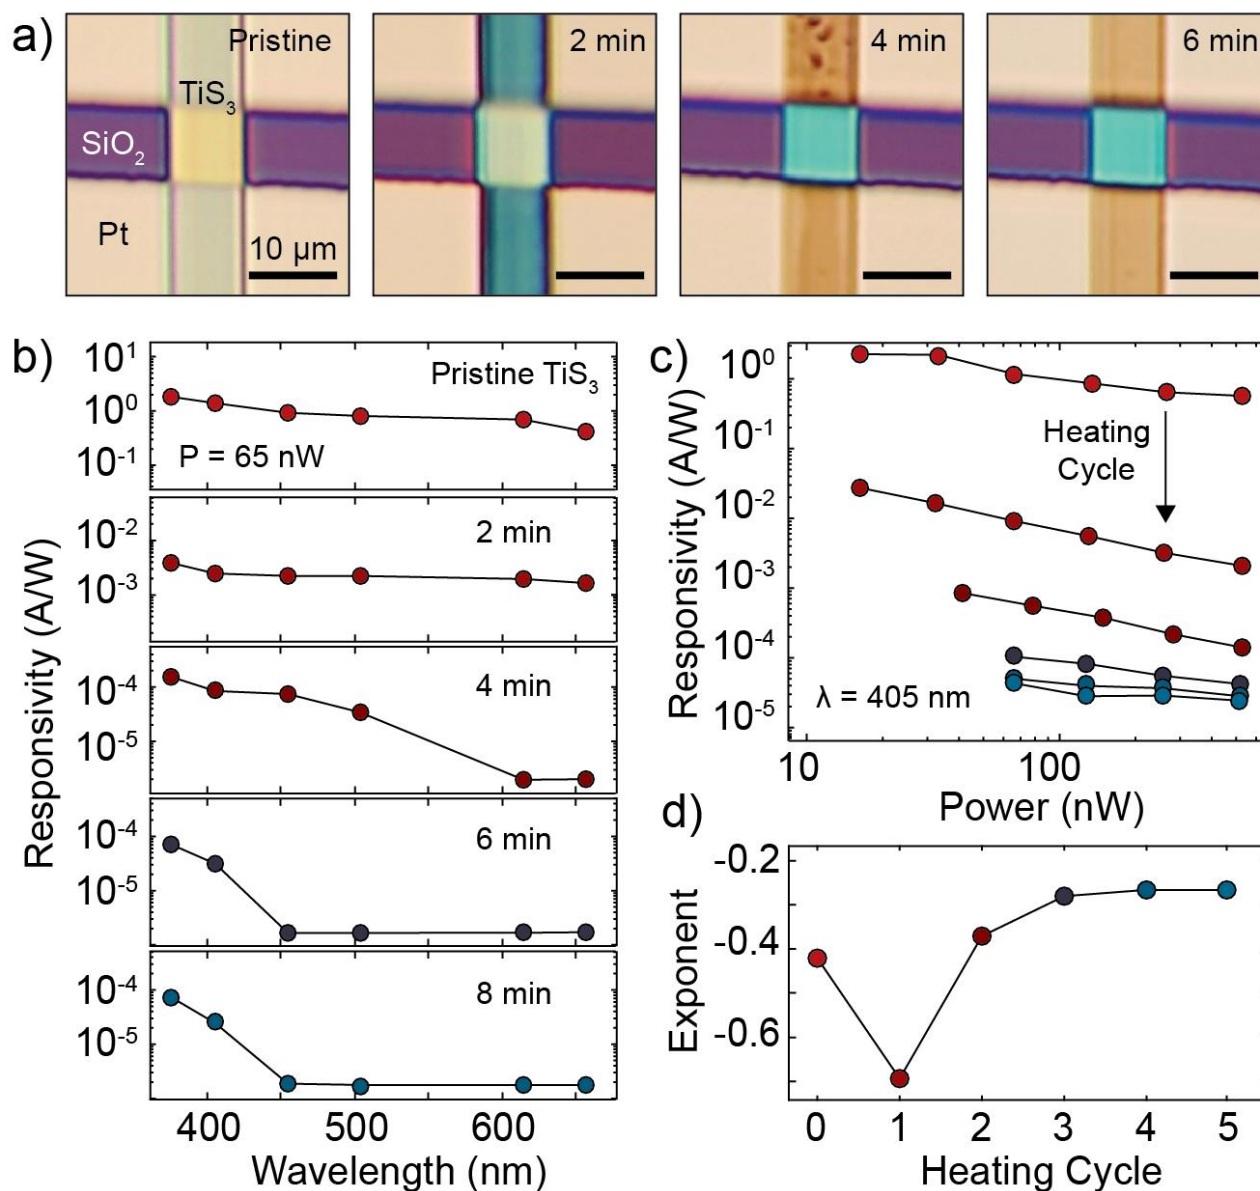

**Figure S7:** a) Optical microscope image of a TiS<sub>3</sub> photodetector (device 2) just after fabrication (left panel) and at different steps of the heating process. b) Responsivity of the device as a function of wavelength for different heating cycles. The pristine TiS<sub>3</sub> device (top) was heated at 320 °C in steps of 2 minutes and after each step the responsivity at different wavelengths was extracted. The two bottom curves correspond to the oxidized TiO<sub>2</sub> device. c) Responsivity of the device at 405 nm as a function of incident power for the pristine device (top curve) and after consecutive heating cycles. d) Responsivity-power law exponent as a function of heating cycle.

#### Section S4 –Stability of TiS<sub>3</sub> during Raman spectroscopy

We performed measurements of TiS<sub>3</sub> ribbons at various incident optical power densities and integration times to probe the stability of TiS<sub>3</sub> during the Raman spectroscopy experiments. The results,

which are collected in Figs. S8 and S9, indicate that  $\text{TiS}_3$  ribbons undergo photooxidation at an incident power of 10 mW (spot size  $\sim 2 \mu\text{m}^2$ , power density  $5 \text{ mW}/\mu\text{m}^2$ ). In the case of lower densities we do not observe any degradation or photooxidation for exposition times as large as 60 s.

Figure S8a shows a semilogarithmic representation of the Raman spectra of a  $\text{TiS}_3$  ribbon recorded for different incident powers (in sequence 0.2 mW, 2 mW, 5 mW, 10 mW, 20 mW, 0.2 mW) and different integration times. In all the three panels one can see that the spectra recorded at the lowest excitation power of 0.2 mW in the pristine state and after the application of the larger powers are different. While the pristine spectrum (red) shows only the peaks due to  $\text{TiS}_3$ , the final spectrum shows an additional peak at  $142 \text{ cm}^{-1}$ , due to  $\text{TiO}_2$ , independent on the integration time. This indicates that the laser at 532 nm used in the Raman experiments can oxidize the  $\text{TiS}_3$  ribbons. Figure S8b shows the spectra recorded with integration time 10 s with a vertical offset added for clarity. From these spectra it is clear that the additional peak at  $142 \text{ cm}^{-1}$  appears during the measurement at 10 mW. To quantify this phenomenon we perform a fit of the peaks at  $142 \text{ cm}^{-1}$  (due to  $\text{TiO}_2$ ) and at  $301 \text{ cm}^{-1}$  (due to  $\text{TiS}_3$ ) indicated by the shaded areas in panel b. Figure S8c shows the ratio between the areas of the peaks at  $301 \text{ cm}^{-1}$  and  $142 \text{ cm}^{-1}$  as a function of the incident power. By inspecting the plot we see that the ratio between the peaks is constant for powers as large as 5 mW (power density  $2.5 \text{ mW}/\mu\text{m}^2$ ) and that rapidly decreases to zero (in an irreversible way) at a power of 10 mW (power density  $5 \text{ mW}/\mu\text{m}^2$ ). In the case of an incident power equal or lower than 5 mW we do not observe any laser induced oxidation for integration times as long as 60 s as can be seen in Figure S9.



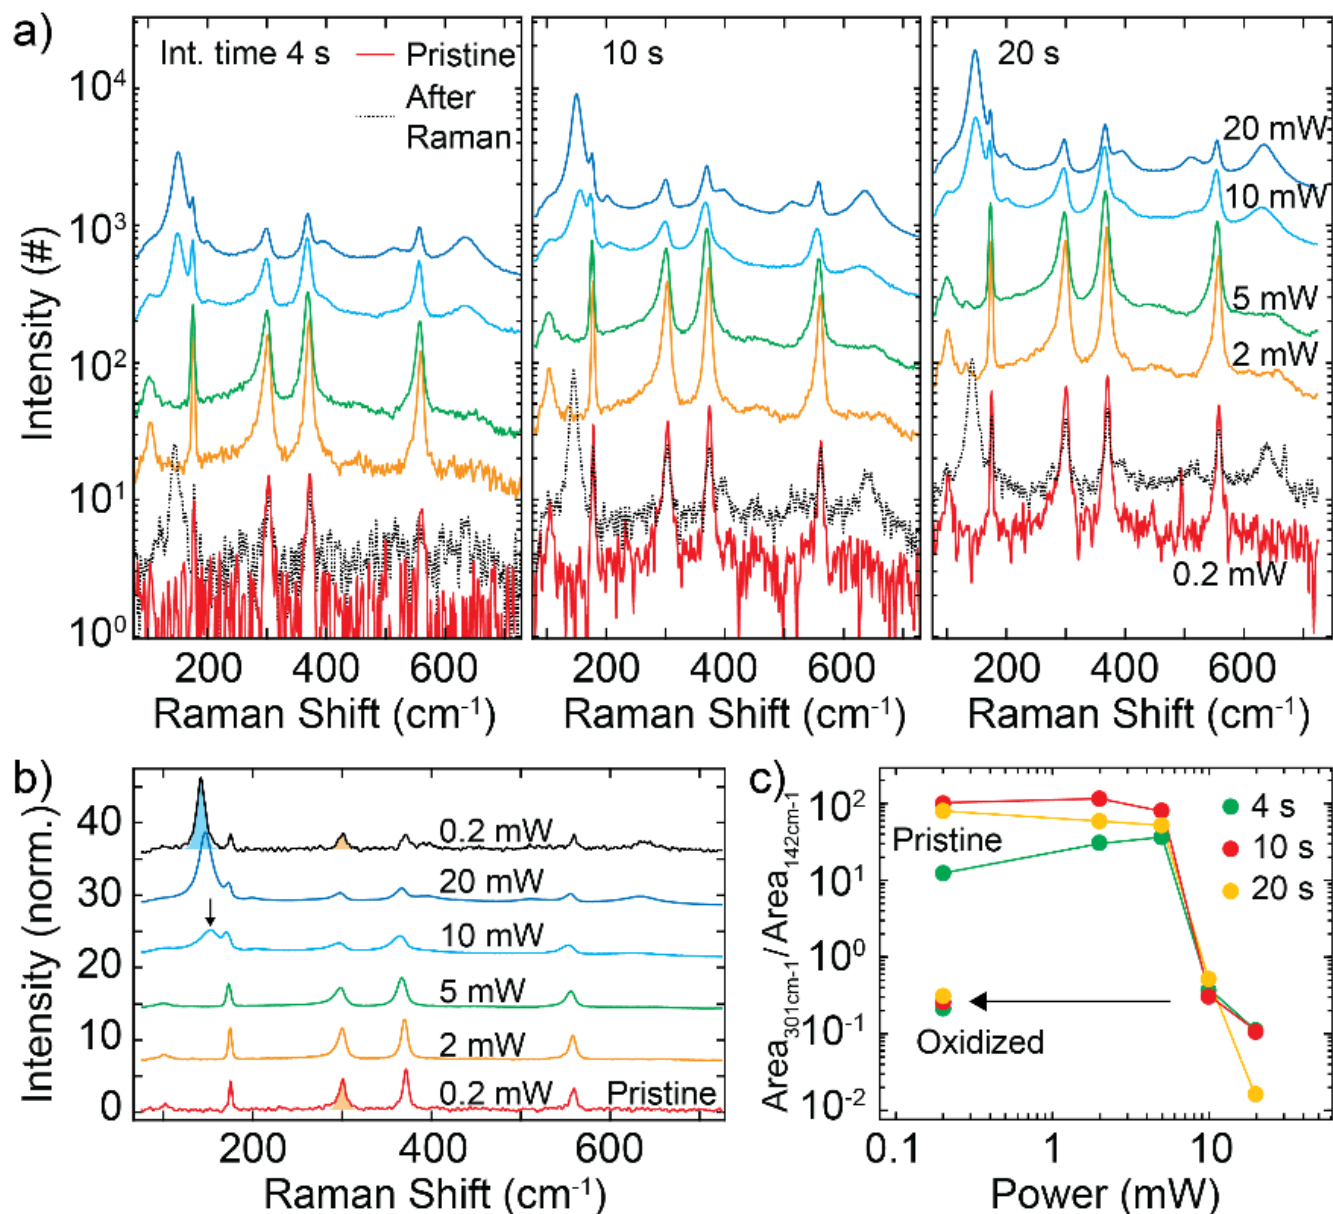

**Figure S8:** a) Raman spectroscopy of a  $\text{TiS}_3$  ribbon as a function of illumination power (curves with different colours) and integration time. For each integration time (4 s, 10 s and 20 s) we select a different position in the ribbon to probe the pristine material. b) Raman spectra recorded with integration time 10 s at different incident powers. Each spectrum is normalized by the incident power. A vertical offset has been introduced for clarity. c) Ratio between the areas of the peaks at  $301\text{ cm}^{-1}$  (related to  $\text{TiS}_3$ ) and at  $142\text{ cm}^{-1}$  ( $\text{TiO}_2$ ) as a function of power.

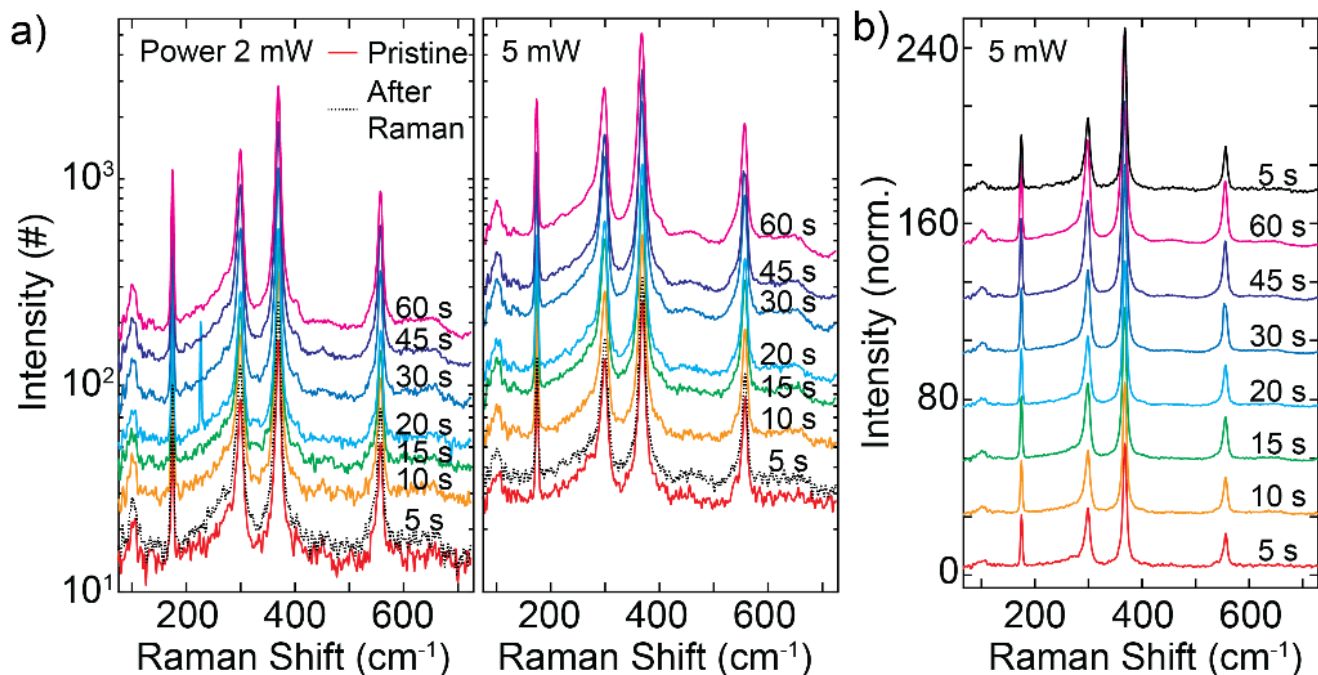

**Figure S9:** a) Raman spectroscopy of a  $\text{TiS}_3$  ribbon as a function of integration time (curves with different colours) for different powers. For each power we select a different position in the ribbon to probe the pristine material. b) Raman spectra recorded with incident power 5 mW time at different integration times. Each spectrum is normalized by the integration time. A vertical offset has been introduced for clarity.

## Section S5 - Theory

To calculate the electronic band structure, we have performed state-of-the-art Density Functional Theory (DFT) calculations with a pseudo-potential plane-wave method as implemented in the PWSCF code of the Quantum-ESPRESSO suite. For both Ti and S, the electron exchange-correlation potential is evaluated within the generalized gradient approximation throughout the Perdew-Burke-Ernzerhof's functional. For S the Martins-Troulliers', while for Ti the Goedecker-Hartwigsen-Hutter-Teter's pseudo-potentials are used, including semi-core states for the valence electrons. In all structures we have optimized the atomic positions with a residual force after relaxation of 0.001 a.u. and have also included van der Waals corrections. The kinetic energy cutoff for the plane wave basis set is put at 220 Ry, while the cutoff for the charge density is 880 Ry. The sampling of the Brillouin zone is  $6 \times 6 \times 6$  according to the Monkhorst-Pack scheme. The parameters chosen ensure a convergence of the DFT band gap within an accuracy of around 0.01 eV. In general, DFT underestimates the band gap, however those results might be used to estimate tendencies, like an increase or decrease in the band gap under oxidation. To compare better with the experimental values, we have further performed a more refined calculation for some of the structures based on non-self-consistent GW method. This opens up the DFT gap (0.37 eV) for pristine  $\text{TiS}_3$  to the experimental levels (about 1.2 eV). The GW band gaps have been converged within an accuracy of around 0.05 eV.



In order to construct the intermediate oxidation structures, we have started with the relaxed structures of pristine  $\text{TiS}_3$  and have replaced three S atoms (in a unit-cell of eight atoms) by two O atoms. We have relaxed possible oxidation states by varying the position of the atom replacements. The three structures in Fig. 6a correspond to the ones of lowest total energy, which are most likely to be formed during the oxidation process. Similar techniques have been applied to find the structures for the fully oxidized states. For these structures, we have also performed a GW calculation to evaluate the band gap. Both DFT and GW show an increase of the gap at the  $\Gamma$ -point of the band structures of interest for these experiments, ranging from about 1 eV for  $\text{TiS}_3$  to about 3 eV for the  $\text{TiO}_2$  in the rutile structure. In Fig. S10, we report the electronic band structure at the DFT for the  $\text{TiO}_2$  in the rutile, anatase, IV and V allotropes (see Fig. 6a) over the first Brillouin Zone. A GW calculation most of the times opens up the band gap with a rigid shift of the conduction bands. For intermediate oxidation states, the evaluation of the actual atomic configuration is more difficult since one should consider exceedingly large super cells where to build the possible atomic configurations, but our results show clearly an increase of the DFT band gap from 0.31 eV for  $\text{TiS}_3$  to about 0.7 eV for the partially oxides structures, to more than 2 eV for the  $\text{TiO}_2$  in the different allotropic forms. These results are consistent with other already present in the literature for  $\text{TiO}_2$ .

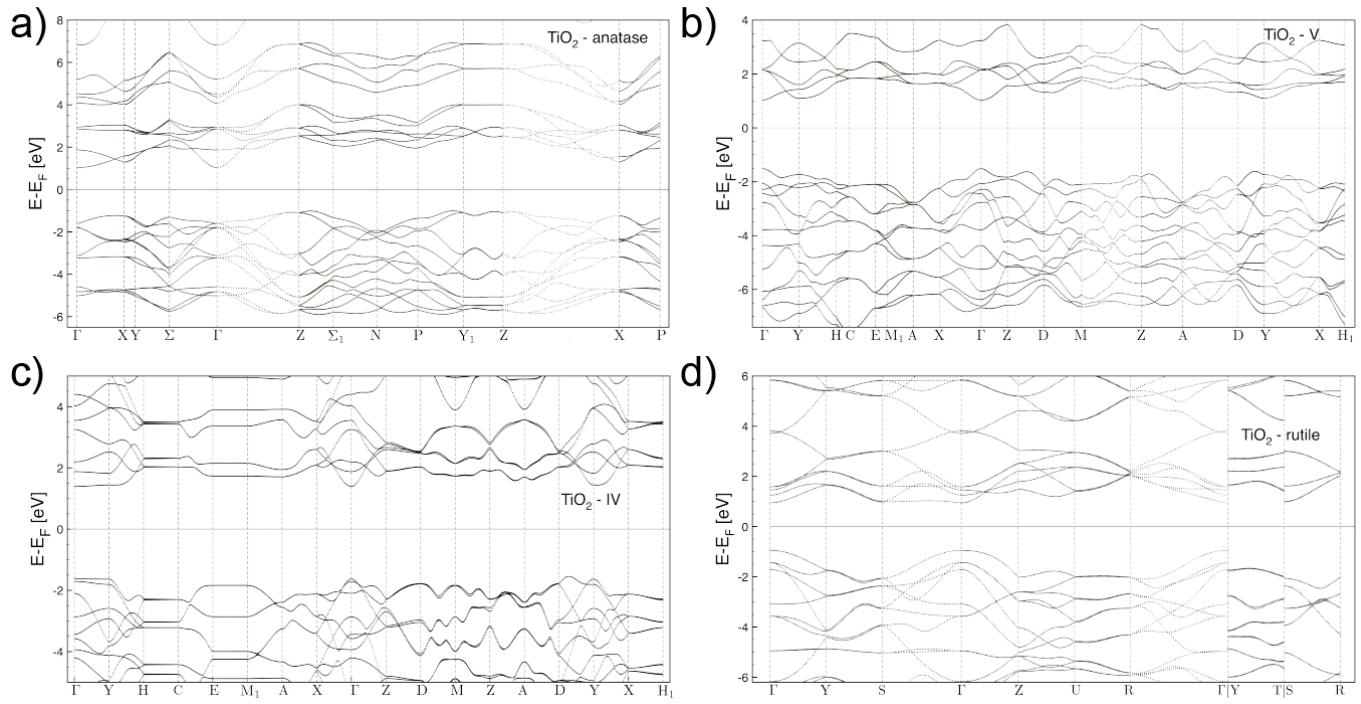

**Figure S10:** Band structure calculated with DFT along the first Brillouin Zone for the different allotropes of the  $\text{TiO}_2$ , (a) anatase, (b) V, (c) IV, and (d) rutile.
